# Supplementary material
Source: PubMed Central journal article supplement (PMC5152766)
Supplement: NIHMS731758-supplement-Supplement.pdf [file NIHMS731758-supplement-Supplement.pdf]

**Situation Awareness Global Assessment Technique (SAGAT) Questions**

Question Set 1

|    |                                                                                                                                                |                                                         |                                                              |                                                              |                                                              |
|----|------------------------------------------------------------------------------------------------------------------------------------------------|---------------------------------------------------------|--------------------------------------------------------------|--------------------------------------------------------------|--------------------------------------------------------------|
| 1  | Which of these patients is most likely to need an ICU bed?                                                                                     | Gail Quattro (QUAT, GA)<br>Chest Pain<br>Rm: 128        | Laura Grissom (GRIS, LA)<br>Abdominal Pain<br>Rm: 126R       | Witold Strong (STRO, WI)<br>MS Changes<br>Rm: 127R           | Rosemary Moeller (MOEL, RO)<br>Earache, Infection<br>Rm: 129 |
| 2  | Which patient has a same name alert?                                                                                                           | Witold Strong (STRO, WI)<br>MS Changes<br>Rm: 127R      | Rosemary Moeller (MOEL, RO)<br>Earache, Infection<br>Rm: 129 | Laura Grissom (GRIS, LA)<br>Abdominal Pain<br>Rm: 126R       | Gail Quattro (QUAT, GA)<br>Chest Pain<br>Rm: 128             |
| 3  | Which nurse has the lowest patient workload right now?                                                                                         | Shane Smith (SMIT)                                      | Elise Kowalski (KOWA)                                        | Mary Mahoney (MAHO)                                          | Wendy Brown (BROW)                                           |
| 4  | Has patient Witold Strong (STRO, WI) (MS Changes, Rm: 127R) had his X-Ray completed yet?                                                       | Yes                                                     |                                                              | No                                                           |                                                              |
| 5  | Who might you guess will be most likely to have the next disposition decision?                                                                 | Gail Quattro (QUAT, GA)<br>Chest Pain<br>Rm: 128        | Laura Grissom (GRIS, LA)<br>Abdominal Pain<br>Rm: 126R       | Witold Strong (STRO, WI)<br>MS Changes<br>Rm: 127R           | Rosemary Moeller (MOEL, RO)<br>Earache, Infection<br>Rm: 129 |
| 6  | Which patient has a non medical, security related alert?                                                                                       | Anthony Conibear (CONI, AN)<br>Renal Colic<br>Rm: 101R  | Michael Nugent (NUGE, MI)<br>Scalp Laceration<br>Rm: 122L    | Eric Grissom (GRIS, ER)<br>SOB w/ walking<br>Rm: 116R        | Lisa Legresly (LEGR, LI)<br>Low BG<br>Rm: 110R               |
| 7  | On a scale of 1 to 10 with 1 being "running smoothly" and 10 being "out of control," how would you rate the overall state of the ED right now? |                                                         |                                                              |                                                              |                                                              |
| 8  | Will we need extra nurses for the next nursing shift (in about 4 hours)?                                                                       | Yes                                                     |                                                              | No                                                           |                                                              |
| 9  | Which patient in the waiting room is of particulat concern?                                                                                    | Joseph Matlock (MATL, JO)<br>Congestion, Nasal          | Robert Pascoe (PASC, RO)<br>Knee Pain                        | Tony McClure (MCCL, TO)<br>Dental Pain                       | Dennis Robinson (ROBI, DE)<br>Hypertension                   |
| 10 | Which patient has all current orders complete?                                                                                                 | Laura Grissom (GRIS, LA)<br>Abdominal Pain<br>Rm: 126R  | Witold Strong (STRO, WI)<br>MS Changes<br>Rm: 127R           | Rosemary Moeller (MOEL, RO)<br>Earache, Infection<br>Rm: 129 | none of the above                                            |
| 11 | Which patient seems to have been in the ED too long?                                                                                           | Christine Benes (BENE, CH)<br>MVA Chest Pain<br>Rm: 123 | Anthony Conibear (CONI, AN)<br>Renal Colic<br>Rm: 101R       | Michael Nugent (NUGE, MI)<br>Scalp Laceration<br>Rm: 122L    | Kelly Hertel (HERT, KE)<br>Cough<br>Rm: 117R                 |
| 12 | What is the average pain level?                                                                                                                | 2                                                       | 4                                                            | 6                                                            | 8                                                            |
| 13 | Which patient has not been seen by an attending physician?                                                                                     | Karen Savage (SAVA, KA)<br>MVC<br>Rm: 107L              | Douglas, Darling (DARL, DO)<br>Dizziness<br>Rm: 106L         | Debora Pula (PULA, DE)<br>Leg Injury<br>Rm: 102R             | none of the above                                            |
| 14 | How many patients are boarding?                                                                                                                | 0                                                       | 2                                                            | 4                                                            | 6                                                            |
| 15 | How many patients are waiting to leave the ED for a bed or for home?                                                                           | 0                                                       | 1                                                            | 5                                                            | 10                                                           |
| 16 | How many ED beds are open?                                                                                                                     | 1                                                       | 7                                                            | 13                                                           | 20                                                           |

**Situation Awareness Global Assessment Technique (SAGAT) Questions**

Question Set 2

|    |                                                                                                                                                |                                                             |                                                                |                                                                 |                                                                 |
|----|------------------------------------------------------------------------------------------------------------------------------------------------|-------------------------------------------------------------|----------------------------------------------------------------|-----------------------------------------------------------------|-----------------------------------------------------------------|
| 1  | Which patient has an allergy alert posted?                                                                                                     | Pamela Dunn<br>(DUNN, PA)<br>General Illness<br>Rm: 107R    | Robert Dilapo<br>(DILA, RO)<br>Abdomin/Side Pain<br>Rm: 102L   | Gerilyn Bova<br>(BOVA, GE)<br>Finger Pain<br>Rm: 103            | Robin Fohrd<br>(FOHR, RO)<br>Asthma/Wheezing<br>Rm: 125         |
| 2  | Which attending physician has the highest current patient workload?                                                                            | Dan Bartowski<br>(BART)                                     | Brian Lee<br>(LEE)                                             | Chris Barry<br>(BARR)                                           | Frances Martin<br>(MART)                                        |
| 3  | Have labs been ordered for Gladys Carter (CART, GL) Constipation Rm: 127L?                                                                     | Yes                                                         |                                                                | No                                                              |                                                                 |
| 4  | Which of your team's patients is ready for the attending physician to assess next?                                                             | Gladys Carter<br>(CART, GL)<br>Constipation<br>Rm: 127L     | Witold Strong<br>(STRO, WI)<br>MS Changes<br>Rm: 127R          | Laura Grissom<br>(GRIS, LA)<br>Abdominal Pain<br>Rm: 126R       | Rosemary Moeller<br>(MOEL, RO)<br>Earache, Infection<br>Rm: 129 |
| 5  | How many patients are in the waiting room?                                                                                                     | 1                                                           | 5                                                              | 7                                                               | 11                                                              |
| 6  | How many ED beds are waiting to be cleaned?                                                                                                    | 0                                                           | 1                                                              | 2                                                               | 3                                                               |
| 7  | Which patient is likely to crash next?                                                                                                         | Laura Grissom<br>(GRIS, LA)<br>Abdominal Pain<br>Rm: 126R   | Gail Quattro<br>(QUAT, GA)<br>Chest Pain<br>Rm: 128            | Rosemary Moeller<br>(MOEL, RO)<br>Earache, Infection<br>Rm: 129 | Witold Strong<br>(STRO, WI)<br>MS Changes<br>Rm: 127R           |
| 8  | What is the chief complaint for James Johnson (JOHN, JA) in Rm: 116L                                                                           | nasal congestion                                            | general illness                                                | abdominal/side pain                                             | seizure                                                         |
| 9  | How many patients is nurse Wendy Brown caring for?                                                                                             | 1                                                           | 2                                                              | 3                                                               | 4                                                               |
| 10 | Which unassigned patient needs to be seen by an attending physician next?                                                                      | Bonnie Rabe<br>(RABE, BO)<br>General Illness<br>Rm: 126L    | Charles Taylor<br>(TAYL, CH)<br>Abdominal/Side Pain<br>Rm: 115 | Robert Farrugia<br>(FARR, RO)<br>Seizure<br>Rm: 130             | Lynda Benjamin<br>(BENJ, LY)<br>Blackout (Fainting)<br>Rm: 111L |
| 11 | Which patient has been in the ED the longest?                                                                                                  | Nora Skrobacz<br>(SKRO, NO)<br>Abdomin/Side Pain<br>Rm: 118 | Charlene Rores<br>(RORE, CH)<br>Ankle Pain, Injury<br>Rm: 110L | Colleen Cotto<br>(COTT, CO)<br>Abdomin/Side Pain<br>Rm: 104     | Deborah Pula<br>(PULA, DE)<br>Leg Injury<br>Rm: 102R            |
| 12 | How many rooms will open up soon?                                                                                                              | 4                                                           | 9                                                              | 14                                                              | 25                                                              |
| 13 | Has a disposition decision been posted for Rosemary Moeller (Earache, Infection) in Rm: 129?                                                   | Yes                                                         |                                                                | No                                                              |                                                                 |
| 14 | On a scale of 1 to 10 with 1 being "running smoothly" and 10 being "out of control," how would you rate the overall state of the ED right now? |                                                             |                                                                |                                                                 |                                                                 |
| 15 | Which treatment phase has the most patients?                                                                                                   | waiting room                                                | in a bed/waiting for MD                                        | evaluation/treatment                                            | disposition complete                                            |
| 16 | Which waiting room patient should be put in a bed next?                                                                                        | Dennis Robinson<br>(ROBI, DE)<br>Hypertension               | Tony McClure<br>(MCCL, TO)<br>Dental Problem                   | Jeffrey Vance<br>(VANC, JE)<br>General Illnes                   | Jennifer Farrell<br>(FARR, JE)<br>Psych Problem                 |
